# Supplementary material for: A comparison of liquid and solid culture for determining relapse and durable cure in phase III TB trials for new regimens
Source: Springer Nature journal article supplement (doi:10.1186/s12916-017-0955-9), 2017-11-22
Supplement: MOESM1 [file 15251952]

| <b>Country</b> | <b>Name of the IEC/IRB</b>                                                                                                          | <b>Address of the IEC/IRB</b>                                                                                                                                                                                             |
|----------------|-------------------------------------------------------------------------------------------------------------------------------------|---------------------------------------------------------------------------------------------------------------------------------------------------------------------------------------------------------------------------|
| China          | Beijing Chest Hospital of Capital Medical University Ethics Committee                                                               | Ma Chang No.97, Tong Zhou District, Beijing, China                                                                                                                                                                        |
| China          | Shanghai Pulmonary Hospital Ethics Committee                                                                                        | Zheng Min No. 507, Yang Pu District, Shanghai, China                                                                                                                                                                      |
| China          | Tianjin CDC Biomedical Ethics Committee                                                                                             | Hua Yue No.6, He Dong District, TianjinChina                                                                                                                                                                              |
| India          | Biomedical Ethics Committee                                                                                                         | 580, Devli, East Sainik Farms, New Delhi 110062, India                                                                                                                                                                    |
| India          | Institutional Ethics Committee, Mahatma Gandhi Medical College and Hospital                                                         | Mahatma Gandhi Medical College & Hospital, RIICO Institutional Area, Sitapura, Jaipur 302022, India                                                                                                                       |
| Kenya          | KEMRI Scientific Steering Committee KEMRI Ethical Review Committee                                                                  | Kenya Medical Research Institute Mbagathi Road, Nairobi, Kenya                                                                                                                                                            |
| Malaysia       | Medical Research & Ethics Committee, Ministry of Health Malaysia                                                                    | Institute for Health Management, JalanRumah Sakit, Bangsar, 59000 Kuala Lumpur, Malaysia                                                                                                                                  |
| Mexico         | Comité de Investigación y Ética (División de Enseñanza, Investigación, Capacitación, Ética y Calidad) Hospital General de Occidente | Av. Zoquipan # 1050. Col. Seattle, Zapopan, Jalisco CP 45170                                                                                                                                                              |
| Mexico         | National Jewish Health                                                                                                              | 1400 Jackson St. Denver Co. 80206USA                                                                                                                                                                                      |
| South Africa   | Biomedical Research Ethics Committee                                                                                                | Govan Mbeki Building (Rm N40), University of KwaZulu Natal, Westville Campus, 4001,Durban,                                                                                                                                |
| South Africa   | Medicines Controll Council                                                                                                          | Room NG090 124,Civitas Building,Andries Street, Pretoria, South Africa                                                                                                                                                    |
| South Africa   | Pharma Ethics                                                                                                                       | 123 Amcor Road, Lyttleton Manor, 0157, Pretoria, South Africa                                                                                                                                                             |
| South Africa   | University of Cape Town Human Research Ethics Committee                                                                             | Room E52-24 Old Main Building, Groote Schuur Hospital, Observatory, 7925, Cape Town, South Africa                                                                                                                         |
| South Africa   | Wits Human Research Ethics Committee                                                                                                | 8 Blackwood Avenue , Parktown, 2193, Johannesburg, South Africa                                                                                                                                                           |
| Tanzania       | Kilimanjaro Christian Medical College Research Ethics and Review Committee (KCMC)                                                   | KCM College Opposite Tumaini Restaurant & New Admin Building, Moshi, Tanzania                                                                                                                                             |
| Tanzania       | Mbeya Ethics and Research Committee                                                                                                 | PO Box 419, Mbeya                                                                                                                                                                                                         |
| Tanzania       | National Institute for Medical Research                                                                                             | 2448, Ocean Road, Dar Es Salaam, Tanzania                                                                                                                                                                                 |
| Thailand       | Ethical Review Committee for Research in Human Subjects, Ministry of Public Health                                                  | The Office of the Secretary, Ethical Review Committee for Research in Human Subjects, Departemnt of Medical Services, 3rd Floor of the Building No.2, Ministry of Public Health, Tiwanon Road, Nonthaburi 11000, Thailand |
| Thailand       | Ethical Review Committee of Chest Disease Institute, Department of Medical Services and Ministry of Public Health                   | 39 Tiwanon Road, Amphur Muang, Nonthaburi 11000, Thailand                                                                                                                                                                 |
| Thailand       | Ethics Committees on Researches Involving Human Subjects, Rajavithi Hospital, Bangkok, Thailand                                     | 2 Rajavithi Road, Rajjathevi District, Bangkok 10400, Thailand                                                                                                                                                            |
| Thailand       | The Khon Kaen University Ethics Committee for Human Research Faculty of Medicine, Khon Kaen University                              | 17th Floor, Sumdetprasrinagarindtrabhoromrachonn ee BuildingSrinagarind Hospital 123 Mitraprap Road, Muang Khon Kaen 40002, Thailand                                                                                      |
| Zambia         | University of Zambia Biomedical Research Ethics Committee                                                                           | Ridgeway Campus, John Mbita Road, Lusaka, Zambia                                                                                                                                                                          |
| Zambia         | University of Zambia BiomedicalResearch Ethics Committee                                                                            | Ridgeway Campus, John Mbita Road,Lusaka, Zambia                                                                                                                                                                           |
